# Supplementary material
Source: PubMed Central journal article supplement (PMC3457370)

**Supplementary Materials**

**Supplementary Table 1:** Activity of ASV in combination with BMS-791325, an allosteric NS5B inhibitor targeting site I

| Expt | ASV<br>EC <sub>50</sub> , nM | BMS-791325<br>EC <sub>50</sub> , nM | Ratio,<br>BMS-791325 to<br>ASV | Combination Indices (Confidence Interval) |                   |                   | Overall Result |
|------|------------------------------|-------------------------------------|--------------------------------|-------------------------------------------|-------------------|-------------------|----------------|
|      |                              |                                     |                                | 50% Effective                             | 75% Effective     | 90% Effective     |                |
| 1    | 0.7                          | 3                                   | 4:1                            | 1.05 (0.98, 1.12)                         | 0.96 (0.86, 1.06) | 0.88 (0.74, 1.02) | Additivity     |
|      |                              |                                     | 8:5                            | 0.95 (0.87, 1.03)                         | 0.99 (0.88, 1.09) | 1.04 (0.84, 1.23) | Additivity     |
|      |                              |                                     | 10:1                           | 0.98 (0.91, 1.06)                         | 0.99 (0.88, 1.09) | 0.99 (0.82, 1.15) | Additivity     |
| 2    | 0.7                          | 3                                   | 4:1                            | 1.04 (0.96, 1.12)                         | 0.95 (0.84, 1.05) | 0.86 (0.71,1.01)  | Additivity     |
|      |                              |                                     | 8:5                            | 0.97 (0.89, 1.05)                         | 1.00 (0.88, 1.12) | 1.03 (0.84, 1.22) | Additivity     |
|      |                              |                                     | 10:1                           | 0.97 (0.89, 1.05)                         | 0.98 (0.87, 1.10) | 1.0 (0.82, 1.18)  | Additivity     |
| 3    | 0.9                          | 4                                   | 4:1                            | 1.00 (0.92, 1.07)                         | 0.96 (0.86, 1.06) | 0.92 (0.77, 1.08) | Additivity     |
|      |                              |                                     | 8:5                            | 1.07 (1.00, 1.14)                         | 1.00 (0.91, 1.09) | 0.93 (0.80, 1.07) | Additivity     |
|      |                              |                                     | 10:1                           | 1.02 (0.93, 1.11)                         | 1.03 (0.90, 1.16) | 1.04 (0.84, 1.24) | Additivity     |

**Supplementary table 2:** Activity of ASV in combination with HCV-796, an allosteric inhibitor targeting site II

| Expt | ASV EC <sub>50</sub> , nM | HCV-796 EC <sub>50</sub> , nM | Ratio, HCV-796 to ASV | Combination Indices (Confidence Interval) |                   |                   | Overall Result                  |
|------|---------------------------|-------------------------------|-----------------------|-------------------------------------------|-------------------|-------------------|---------------------------------|
|      |                           |                               |                       | 50% Effective                             | 75% Effective     | 90% Effective     |                                 |
| 1    | 0.001                     | 0.187                         | 1:160                 | 0.85 (0.77, 0.93)                         | 0.88 (0.76, 0.99) | 0.91 (0.72, 1.10) | Synergy/Additivity <sup>a</sup> |
|      |                           |                               | 1:400                 | 0.99 (0.90, 1.08)                         | 0.93 (0.81, 1.05) | 0.88 (0.70, 1.05) | Additivity                      |
|      |                           |                               | 1:1000                | 1.03 (0.93, 1.12)                         | 0.91 (0.80, 1.02) | 0.81 (0.65, 0.97) | Synergy/Additivity <sup>a</sup> |
| 2    | 0.0013                    | 0.393                         | 1:160                 | 0.92 (0.85, 0.99)                         | 0.88 (0.79, 0.98) | 0.85 (0.71, 0.99) | Synergy                         |
|      |                           |                               | 1:400                 | 0.92 (0.85, 0.99)                         | 0.90 (0.8, 1.00)  | 0.88 (0.73, 1.04) | Synergy/Additivity <sup>b</sup> |
|      |                           |                               | 1:1000                | 1.08 (0.99, 1.16)                         | 1.07 (0.95, 1.19) | 1.06 (0.88, 1.25) | Additivity                      |

<sup>a</sup>In experiment 1, synergy observed at 50% and 75% effective level at 1:160 ratio of ASV and HCV-796 and at 90% at the 1:1000 ratio

<sup>b</sup>In experiment2, synergy observed at 50%, additivity observed at 75% and 90% effective levels

**Supplementary Table 3:** Activity of ASV in combination with NM-107, a NS5B nucleoside inhibitor

| Exp            | ASV EC <sub>50</sub> , μM | NM-107 EC <sub>50</sub> , μM | Ratio, NM-107 to ASV | Combination Indices (Confidence Interval) |                   |                   | Overall Result                  |
|----------------|---------------------------|------------------------------|----------------------|-------------------------------------------|-------------------|-------------------|---------------------------------|
|                |                           |                              |                      | 50% Effective                             | 75% Effective     | 90% Effective     |                                 |
| 1 <sup>a</sup> | 0.0015                    | 1.375                        | 1:80                 | 0.82 (0.75, 0.89)                         | 0.90 (0.79, 1.01) | 1.00 (0.81, 1.18) | Synergy/Additivity              |
|                |                           |                              | 1:200                | 0.85 (0.78, 0.93)                         | 0.90 (0.79, 1.01) | 0.96 (0.78, 1.14) | Synergy/Additivity              |
|                |                           |                              | 1:500                | 0.88 (0.81, 0.96)                         | 0.89 (0.78, 0.99) | 0.91 (0.74, 1.08) | Synergy/Additivity              |
| 2              | 0.0007                    | 1.094                        | 1:80                 | 0.85 (0.78, 0.91)                         | 0.90 (0.80, 1.00) | 0.96 (0.79, 1.12) | Synergy/Additivity <sup>b</sup> |
|                |                           |                              | 1:200                | 1.01 (0.93, 1.09)                         | 1.04 (0.93, 1.15) | 1.07 (0.89, 1.25) | Additivity                      |
|                |                           |                              | 1:500                | 0.95 (0.87, 1.02)                         | 0.93 (0.83, 1.02) | 0.91 (0.76, 1.06) | Additivity                      |

<sup>a</sup>In experiment 1, synergy observed at 50% effective level at all drug ratios and at 75% at the 1:500 ratio of ASV and NM-107

<sup>b</sup>In experiment 2, synergy was observed at 50% and 75%, additivity was observed at 90% effective level

**Supplementary Table 4:** Triple combination studies using ASV, daclastavir and rIFN $\alpha$

| Exp <sup>a</sup> | ASV EC <sub>50</sub> , nM | DCV EC <sub>50</sub> , nM | rIFN $\alpha$ EC <sub>50</sub> , units<br>per mL | Combination Indices (Confidence Interval) |                   |                   | Overall Result                  |
|------------------|---------------------------|---------------------------|--------------------------------------------------|-------------------------------------------|-------------------|-------------------|---------------------------------|
|                  |                           |                           |                                                  | 50% Effective                             | 75% Effective     | 90% Effective     |                                 |
| 1                | 1.5                       | 0.005                     | 6.4                                              | 0.99 (0.89, 1.08)                         | 0.87 (0.76, 0.98) | 0.79 (0.64, 0.95) | Additivity/Synergy <sup>b</sup> |
| 2                | 1.3                       | 0.005                     | 7.0                                              | 0.93 (0.85, 1.02)                         | 0.81 (0.71, 0.91) | 0.72 (0.58, 0.85) | Additivity/Synergy <sup>b</sup> |
| 3                | 2.2                       | 0.006                     | 5.9                                              | 0.88 (0.77, 0.99)                         | 0.81 (0.69, 0.94) | 0.79 (0.61, 0.97) | Synergy                         |
| 4                | 1.9                       | 0.005                     | 2.3                                              | 0.98 (0.86, 1.10)                         | 0.83 (0.68, 0.97) | 0.75 (0.55, 0.96) | Additivity/Synergy <sup>b</sup> |

<sup>a</sup>Compounds tested at molar ratio of 250:1:500, ASV to daclastavir to rIFN $\alpha$

<sup>b</sup>In experiments 1, 2, and 4 additivity observed at 50%, synergy observed at 75% and 90% effective levels

**Supplementary Table 5:** Triple combination studies using ASV, BMS-791325 and rIFN $\alpha$

| Exp <sup>a</sup> | ASV EC <sub>50</sub> , nM | '325 EC <sub>50</sub> , nM | rIFN $\alpha$ EC <sub>50</sub> ,<br>units per mL | Combination Indices (Confidence Interval) |                   |                   | Overall Result |
|------------------|---------------------------|----------------------------|--------------------------------------------------|-------------------------------------------|-------------------|-------------------|----------------|
|                  |                           |                            |                                                  | 50% Effective                             | 75% Effective     | 90% Effective     |                |
| 1                | 2.5                       | 4.6                        | 4.5                                              | 0.92 (0.82, 1.02)                         | 0.94 (0.80, 1.07) | 0.98 (0.76, 1.20) | Additivity     |
| 2                | 2.4                       | 6.5                        | 6.5                                              | 0.98 (0.90, 1.07)                         | 0.91 (0.81, 1.02) | 0.88 (0.72, 1.04) | Additivity     |

<sup>a</sup>Compounds tested at molar ratio of 1:4:2, ASV to '325 (BMS-791325) to rIFN $\alpha$

**Supplementary Figure 1.** Three-dimensional synergy plot representing the MacSynergy combination analysis of ASV with ribavirin. Representative graph from three independent experiments depicting the interaction between ASV and ribavirin using the MacSynergy II software developed by Pritchard and Shipman (University of Michigan, 2003) for data analysis.

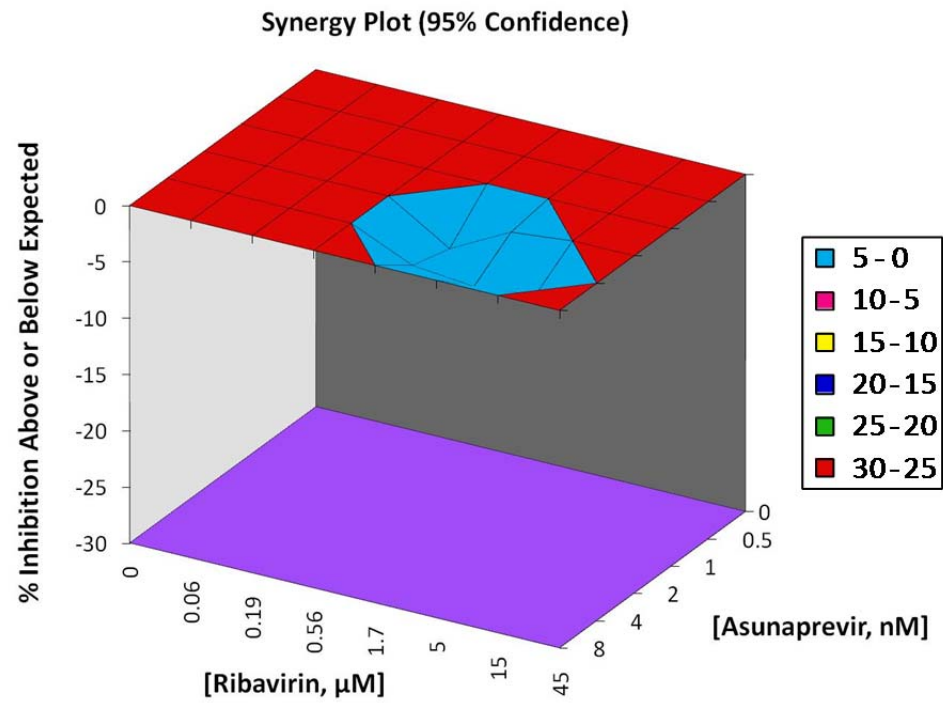

Supplement: AAC.01186-12_zac999101289so1.pdf [file AAC.01186-12_zac999101289so1.pdf]
